# Supplementary material for: Tetraphenylsilane derivatives spiro-annulated by triphenylamine/carbazole with enhanced HOMO energy levels and glass transition temperatures without lowering triplet energy: host materials for efficient blue phosphorescent OLEDs
Source: Royal Society of Chemistry journal article supplement (doi:10.1039/c2tc00082b), 2012-11-07
Supplement: c2tc00082b.pdf [file c2tc00082b.pdf]

## Supplementary Information

### Tetraphenylsilane Derivatives Spiro-Annulated by Triphenylamine/Carbazole with Enhanced HOMO Energy Level and Glass Transition Temperature without Lowering Triplet Energy: Host Materials for Efficient Blue Phosphorescent OLEDs

Cong Fan,<sup>a</sup> Yonghua Chen,<sup>b</sup> Zhongyin Liu,<sup>a</sup> Zuoquan Jiang,<sup>a</sup> Cheng Zhong,<sup>a</sup> Dongge Ma,<sup>\*b</sup> Jingui Qin<sup>a</sup> and Chuluo Yang<sup>\*a</sup>

*a* Department of Chemistry, Hubei Key Lab on Organic and Polymeric Optoelectronic Materials, Wuhan University, Wuhan 430072, P. R. China

*b* State Key Laboratory of Polymer Physics and Chemistry, Changchun Institute of Applied Chemistry, Chinese Academy of Sciences, Changchun 130022, P. R. China

E-mail: clyang@whu.edu.cn

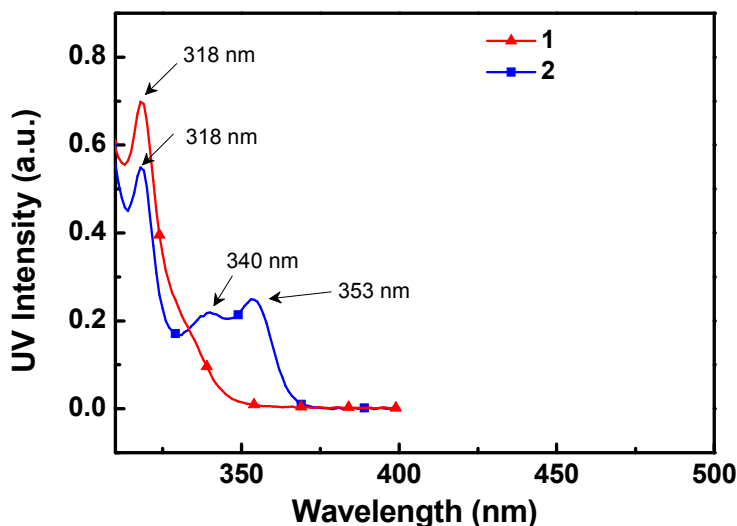

Figure S1. Absorption spectra of 2,7-dibromo-10*H*-phenyl-10*H*-spiro(acridine-9,9'-fluorene) **1** and 2,7-dibromo-10*H*-spiro(indolo[3,2,1-*de*]acridine-9,9'-fluorene) **2** in CH<sub>2</sub>Cl<sub>2</sub> solution.

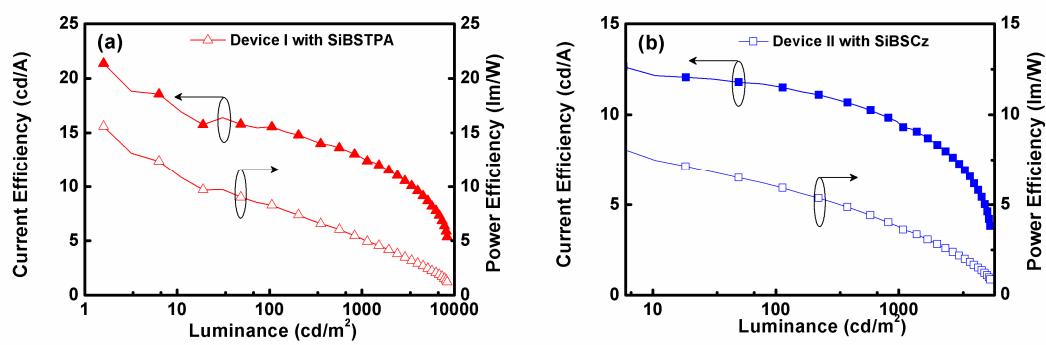

Figure S2. (a) Current efficiency and power efficiency versus luminance of device I; (b) Current efficiency and power efficiency versus luminance of device II.
